# Supplementary material for: Plant-Assisted Synthesis of Ag-Based Nanoparticles on Cotton: Antimicrobial and Cytotoxicity Studies
Source: MDPI journal article supplement (doi:10.3390/molecules29071447), 2024-03-23
Supplement: s1 [file s1]

Table S1 Color coordinates of impregnated fabrics\*

| Sample       | Color coordinates |       |       |       |       |       |       |       |
|--------------|-------------------|-------|-------|-------|-------|-------|-------|-------|
|              | L*                | a*    | b*    | C*    | h     | X     | Y     | Z     |
| CO-CA-Ag-PSC | 47.34             | 16.32 | 21.35 | 26.87 | 52.62 | 18.37 | 16.28 | 9.10  |
| CO-CA-Ag-JR  | 35.22             | 15.19 | 17.91 | 23.48 | 49.70 | 9.97  | 8.61  | 4.68  |
| CO-CA-Ag-HL  | 73.20             | 10.05 | 9.42  | 13.78 | 43.14 | 46.57 | 45.46 | 40.36 |
| CO-CA-Ag-SN  | 45.22             | 13.63 | 11.19 | 17.64 | 39.38 | 16.21 | 14.70 | 11.27 |

\*Color coordinates are determined by Datacolor SF300 spectrophotometer under illuminant D<sub>65</sub> using the 10° standard observer, where  $L^*$  stands for lightness,  $a^*$  red/green value and  $b^*$  yellow/blue value.
